# Supplementary material for: Whole-genome sequencing of six dog breeds from continuous altitudes reveals adaptation to high-altitude hypoxia
Source: HighWire-hosted journal article supplement (doi:10.1101/gr.171876.113), 2014-04-10
Supplement: Supplemental_Material.docx [file Supplemental_Material.docx]

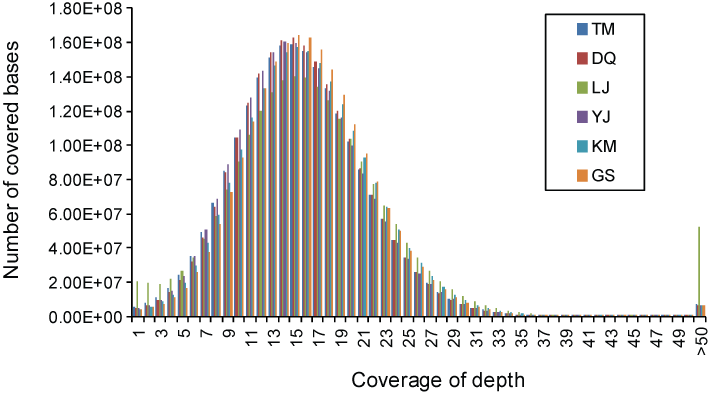


Supplemental Figure 1. Sequencing depth distributions of the six breeds. For each breed, the sequencing depths of ten individuals were averaged for plotting. The mode of each distribution is 15× and most of the bases are covered with a depth ranging from 2 to 30×.


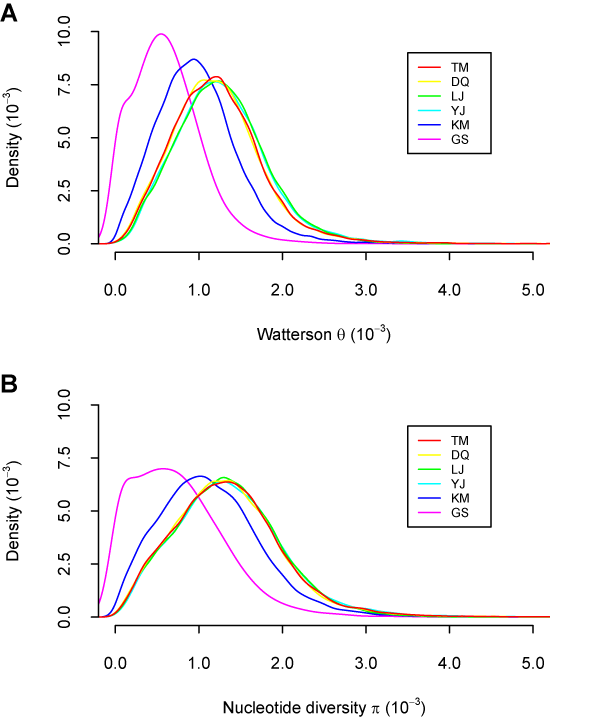


Supplemental Figure 2. Distributions of (A) Watterson’s *θ* and (B) nucleotide diversity *π* across the genome. Both statistics were calculated for a 100 kb sliding window along the genome. Only SNPs on autosomes were considered.


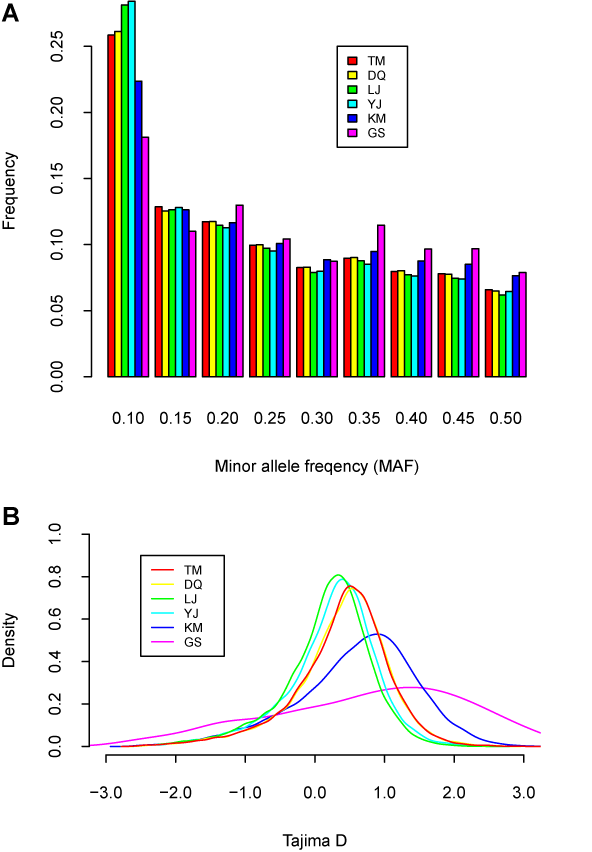


Supplemental Figure 3. Distributions of (A) minor allele frequency and (B) Tajima's *D* across the genome. Alleles with frequency lower than 0.10 were not considered because of the insufficient sample size. The Tajima’s *D* was calculated for a 100 kb sliding window along the genome.


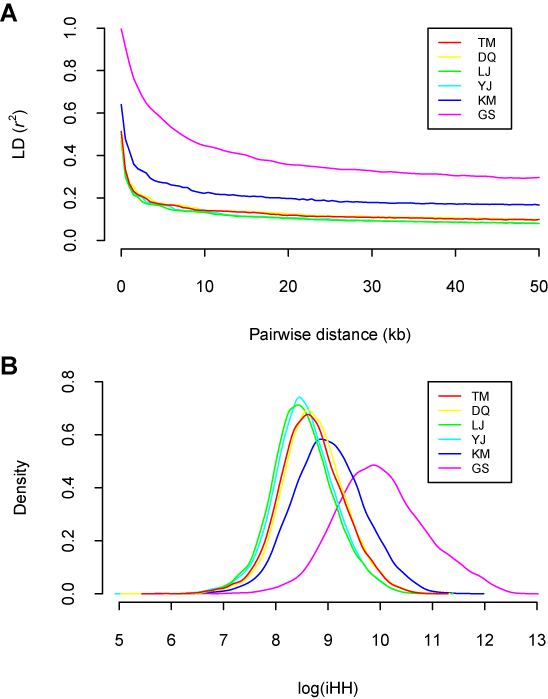


Supplemental Figure 4. Levels of linkage disequilibrium across the genome. (A) The correlation coefficient (*r2*) between two markers decays with the increase of their pairwise distance. The average *r2* against distances was plotted using lowess regression in R. (B) Distributions of integrated haplotype homozygosity (iHH). The iHH was calculated for a 100 kb sliding window along the genome.


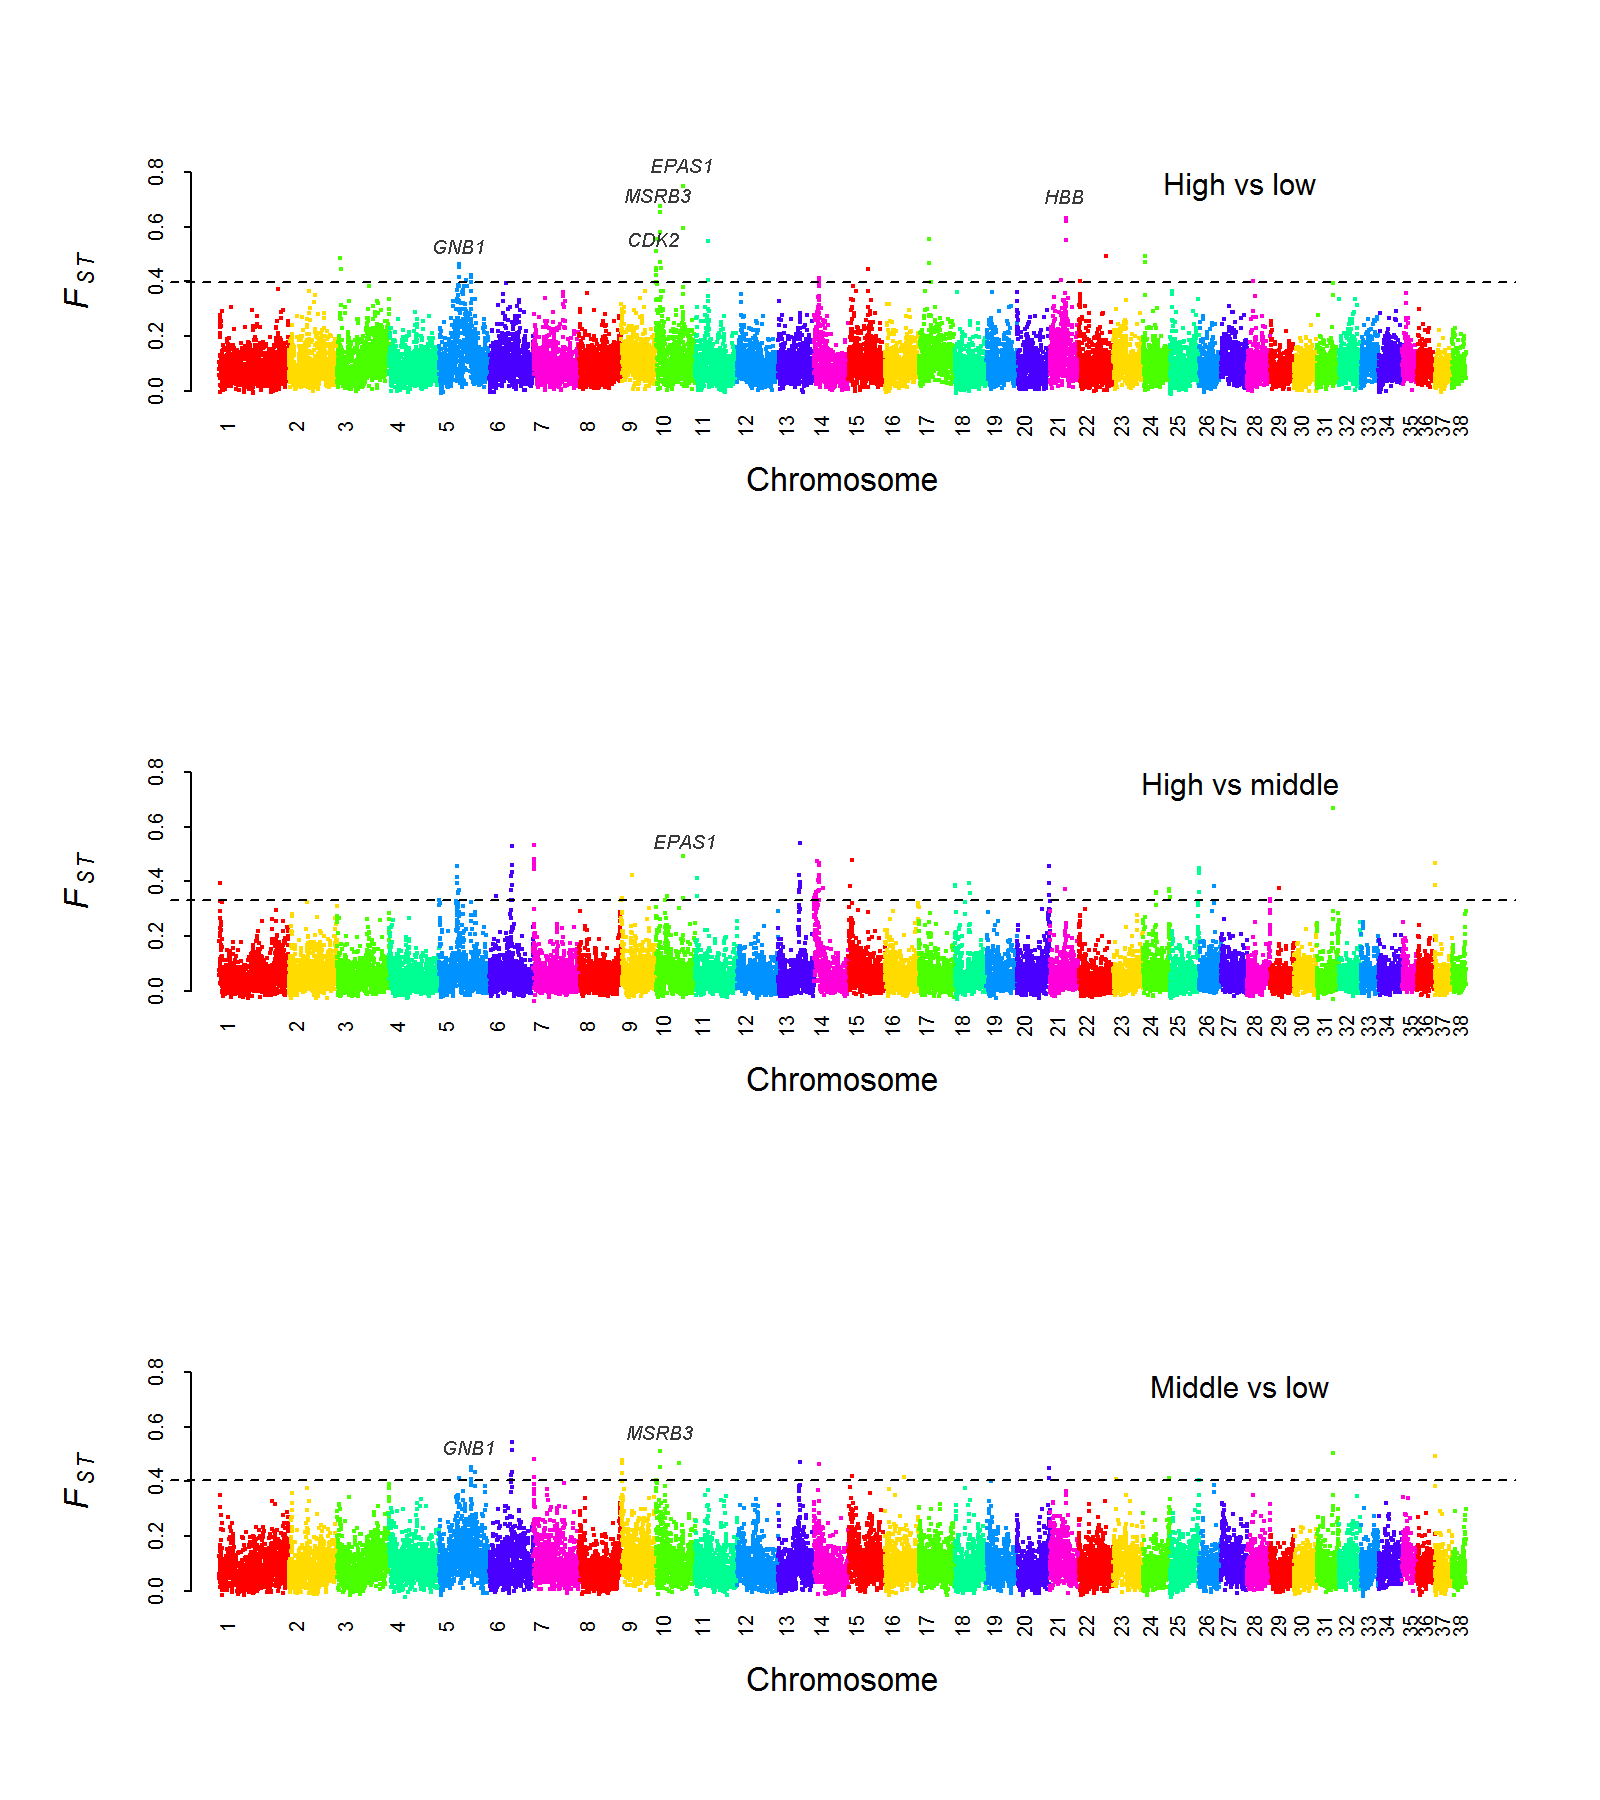


Supplemental Figure 5. Manhattan plot of *FST* between the high- (TM, DQ), middle- (LJ) and low- (YJ, KM, GS) altitude breeds. The *FST* was calculated for each 100 kb autosomal window. The dashed line denotes the threshold of *Z*(*FST*) = 5. The locations of five oxygen-response genes are labeled.


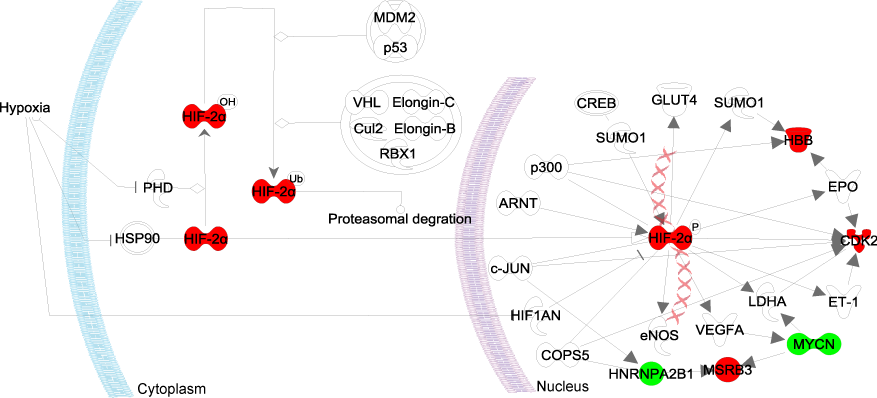


Supplemental Figure 6. EPAS1 signaling pathway. The image was created using the Ingenuity Pathways Analysis (IPA) platform by connecting genes we identified with genes in the hypoxia signaling pathway and HIF-1α signaling pathway from the Ingenuity knowledgebase. The molecules and interactions are shown according to the IPA conventions. The red molecules are genes identified by our selective sweep analysis and belonging to the GO categories ‘response to oxygen levels’ and ‘response to oxidative stress’. The green molecules are mediators that connect the identified genes and the canonical pathways. *GNB1* is not shown in the image as it has too many connections with the pathways.


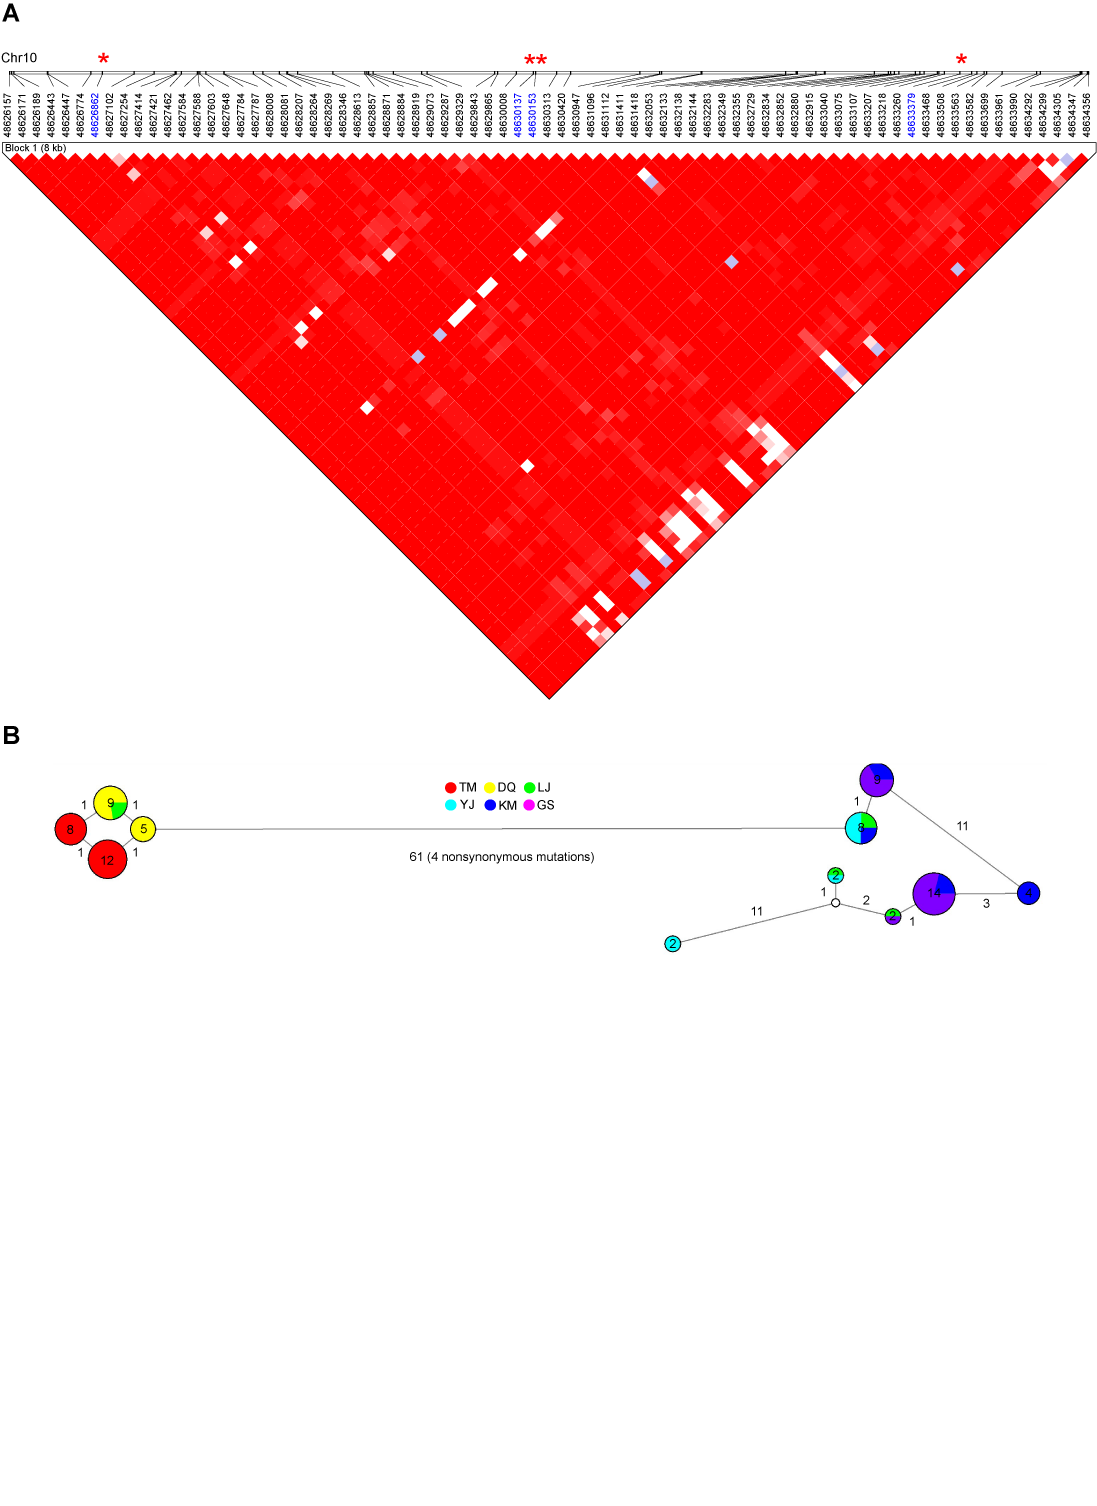


Supplemental Figure 7. LD block and haplotypes comprising the four non-synonymous mutations in *EPAS1*. (A) LD block showing pairwise correlation coefficients (*r2*) between two SNP sites. The colors range from white to red with the increase of *r2* from 0 to 1. The *r2* were calculated based on all the six breeds and only SNP sites with MAF ≥ 0.1 were considered. Positions of the non-synonymous mutations are indicated by red stars. (B) Network of haplotypes in the LD block. Each node represents a haplotype and the node size is proportional to the haplotype frequency. The distribution of a haplotype in the six breeds is represented by pie chart. The edge length is proportional to the number of mutations between two haplotypes. Only haplotypes with frequency > 1 were included.


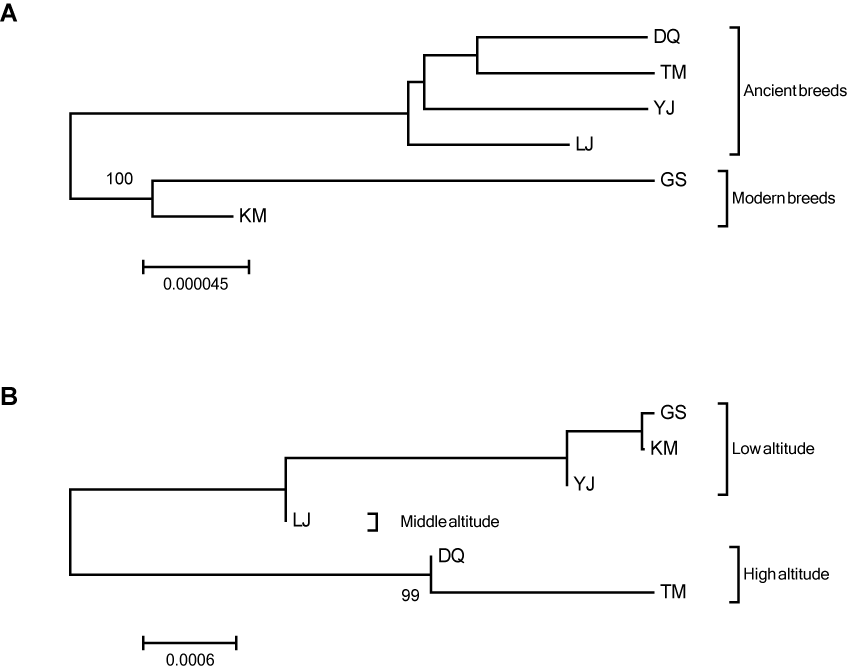


Supplemental Figure 8. Neighbor-joining tree of the six breeds reconstructed from SNP data. (A) Genome-wide SNPs. (B) SNPs in the *EPAS1* haplotype. The evolutionary distance is measured by net nucleotide substitutions per site.

**
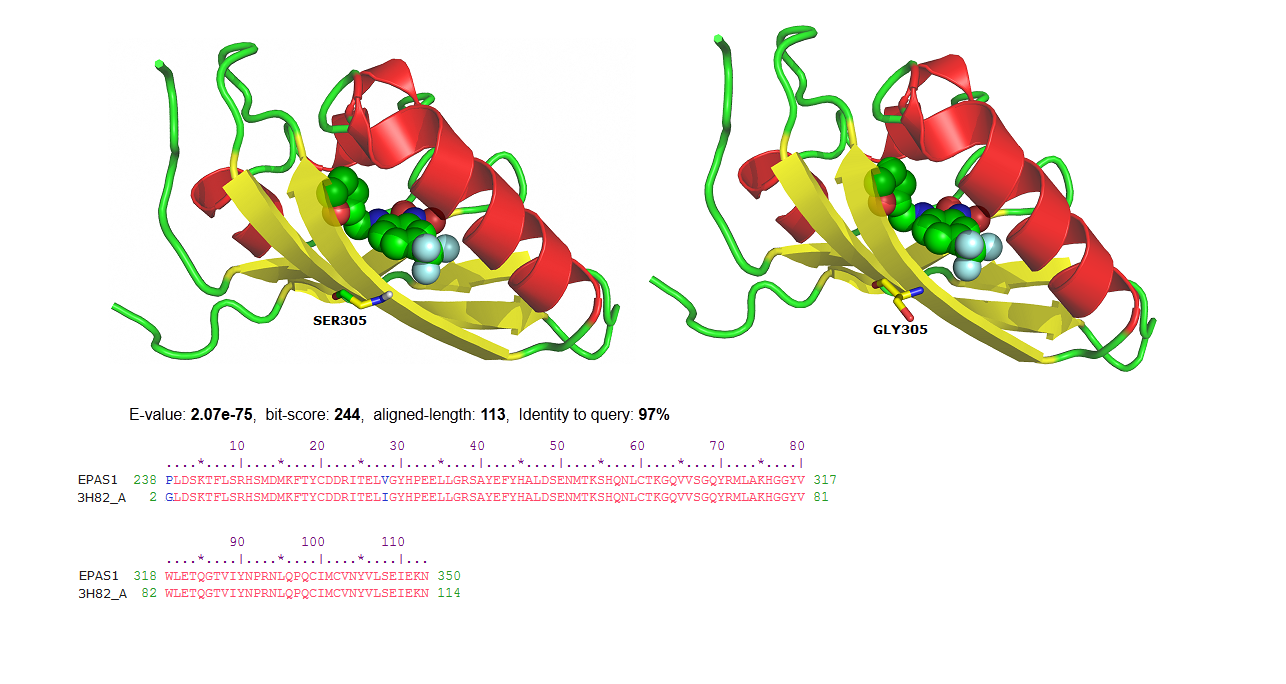
**

Supplemental Figure 9. Predicted model of PAS domain in dog EPAS1. The model was predicted on the basis of the human EPAS1 PAS-B crystal structure (PDB ID: 3H82; an artificial ligand is shown in the structure). The location of mutated residue G305S is marked in the structure, which was predicted to increase the thermodynamic stability of the domain (ΔΔG = -3.09 kcal/mol). Amino acid alignment between dog and human EPAS1 PAS-B show 97% sequence identity. The alignment indicates (|) identical, (:) similar, and (.) dissimilar residues.

Supplemental Table 1. Number of reads and bases in quality control.

| **Breed** | **Sample** | **Raw data** | | **Filter low quality reads** | | **Trim low quality ends** | |
| --- | --- | --- | --- | --- | --- | --- | --- |
| Reads | Bases | Reads | Bases | Reads | Bases |
| **TM** | DQZA01 | 4.67E+08 | 4.72E+10 | 4.00E+08 | 4.04E+10 | 3.87E+08 | 3.79E+10 |
| DQZA06 | 4.57E+08 | 4.25E+10 | 4.00E+08 | 3.72E+10 | 3.91E+08 | 3.55E+10 |
| DQZA12 | 4.72E+08 | 4.39E+10 | 4.10E+08 | 3.81E+10 | 4.00E+08 | 3.63E+10 |
| DQZA18 | 4.24E+08 | 4.24E+10 | 3.55E+08 | 3.55E+10 | 3.39E+08 | 3.26E+10 |
| DQZA19 | 4.50E+08 | 4.50E+10 | 3.77E+08 | 3.77E+10 | 3.63E+08 | 3.48E+10 |
| DQZA23 | 4.72E+08 | 4.72E+10 | 3.93E+08 | 3.93E+10 | 3.77E+08 | 3.62E+10 |
| DQZA33 | 4.73E+08 | 4.73E+10 | 4.16E+08 | 4.16E+10 | 4.04E+08 | 3.94E+10 |
| DQZA55 | 4.42E+08 | 4.42E+10 | 3.71E+08 | 3.71E+10 | 3.58E+08 | 3.44E+10 |
| DQZA80 | 4.77E+08 | 4.77E+10 | 4.18E+08 | 4.18E+10 | 4.06E+08 | 3.95E+10 |
| DQZA81 | 4.79E+08 | 4.79E+10 | 4.17E+08 | 4.17E+10 | 4.05E+08 | 3.94E+10 |
| **DQ** | DQ25 | 4.66E+08 | 4.66E+10 | 4.16E+08 | 4.16E+10 | 4.05E+08 | 3.94E+10 |
| DQ28 | 4.83E+08 | 4.83E+10 | 4.30E+08 | 4.30E+10 | 4.20E+08 | 4.10E+10 |
| DQ29 | 4.53E+08 | 4.53E+10 | 3.80E+08 | 3.80E+10 | 3.68E+08 | 3.57E+10 |
| DQ32 | 4.91E+08 | 4.91E+10 | 3.98E+08 | 3.98E+10 | 3.84E+08 | 3.72E+10 |
| DQ33 | 4.58E+08 | 4.58E+10 | 4.12E+08 | 4.12E+10 | 4.02E+08 | 3.92E+10 |
| DQ45 | 3.89E+08 | 3.89E+10 | 3.45E+08 | 3.45E+10 | 3.37E+08 | 3.28E+10 |
| DQ52 | 5.01E+08 | 5.01E+10 | 4.26E+08 | 4.26E+10 | 4.13E+08 | 4.00E+10 |
| DQ54 | 3.87E+08 | 3.87E+10 | 3.32E+08 | 3.32E+10 | 3.23E+08 | 3.12E+10 |
| DQ59 | 4.06E+08 | 4.10E+10 | 3.69E+08 | 3.73E+10 | 3.60E+08 | 3.55E+10 |
| DQ60 | 4.62E+08 | 4.62E+10 | 4.10E+08 | 4.10E+10 | 3.99E+08 | 3.87E+10 |
| **LJ** | LJ1 | 4.68E+08 | 4.68E+10 | 4.15E+08 | 4.15E+10 | 4.06E+08 | 3.98E+10 |
| LJ12 | 4.66E+08 | 4.66E+10 | 4.14E+08 | 4.14E+10 | 4.06E+08 | 3.98E+10 |
| LJ13 | 4.65E+08 | 4.65E+10 | 3.98E+08 | 3.98E+10 | 3.87E+08 | 3.80E+10 |
| LJ2 | 3.95E+08 | 3.95E+10 | 3.55E+08 | 3.55E+10 | 3.48E+08 | 3.42E+10 |
| LJ6 | 4.39E+08 | 4.39E+10 | 3.80E+08 | 3.80E+10 | 3.71E+08 | 3.61E+10 |
| LJ8 | 4.61E+08 | 4.61E+10 | 3.96E+08 | 3.96E+10 | 3.83E+08 | 3.73E+10 |
| WM3 | 3.66E+08 | 3.66E+10 | 3.34E+08 | 3.34E+10 | 3.28E+08 | 3.23E+10 |
| YL1 | 4.57E+08 | 4.57E+10 | 3.99E+08 | 3.99E+10 | 3.90E+08 | 3.80E+10 |
| YL5 | 4.54E+08 | 4.54E+10 | 3.98E+08 | 3.98E+10 | 3.89E+08 | 3.80E+10 |
| YL7 | 4.27E+08 | 4.27E+10 | 3.82E+08 | 3.82E+10 | 3.74E+08 | 3.67E+10 |
| **YJ** | YJ01 | 4.83E+08 | 4.83E+10 | 4.20E+08 | 4.20E+10 | 4.09E+08 | 3.97E+10 |
| YJ03 | 4.89E+08 | 4.89E+10 | 3.85E+08 | 3.85E+10 | 3.65E+08 | 3.48E+10 |
| YJ08 | 4.95E+08 | 4.95E+10 | 3.79E+08 | 3.79E+10 | 3.58E+08 | 3.40E+10 |
| YJ10 | 5.13E+08 | 5.13E+10 | 3.88E+08 | 3.88E+10 | 3.63E+08 | 3.44E+10 |
| YJ14 | 4.89E+08 | 4.89E+10 | 3.74E+08 | 3.74E+10 | 3.50E+08 | 3.33E+10 |
| YJ15 | 4.91E+08 | 4.91E+10 | 4.01E+08 | 4.01E+10 | 3.81E+08 | 3.64E+10 |
| YJ16 | 5.07E+08 | 5.07E+10 | 3.93E+08 | 3.93E+10 | 3.69E+08 | 3.46E+10 |
| YJ17 | 5.11E+08 | 5.11E+10 | 3.99E+08 | 3.99E+10 | 3.78E+08 | 3.59E+10 |
| YJ21 | 4.91E+08 | 4.91E+10 | 3.91E+08 | 3.91E+10 | 3.78E+08 | 3.64E+10 |
| YJ26 | 4.95E+08 | 4.95E+10 | 4.08E+08 | 4.08E+10 | 3.94E+08 | 3.82E+10 |
| **KM** | KD106 | 4.03E+08 | 4.06E+10 | 2.98E+08 | 3.00E+10 | 2.91E+08 | 2.86E+10 |
| KD107 | 4.66E+08 | 4.71E+10 | 4.25E+08 | 4.29E+10 | 4.16E+08 | 4.10E+10 |
| KD110 | 4.63E+08 | 4.63E+10 | 4.08E+08 | 4.08E+10 | 4.00E+08 | 3.90E+10 |
| KD113 | 4.78E+08 | 4.78E+10 | 4.20E+08 | 4.20E+10 | 4.10E+08 | 4.01E+10 |
| KD117 | 4.77E+08 | 4.77E+10 | 4.16E+08 | 4.16E+10 | 4.06E+08 | 3.96E+10 |
| KD207 | 4.36E+08 | 4.40E+10 | 4.00E+08 | 4.04E+10 | 3.91E+08 | 3.86E+10 |
| KD208 | 4.94E+08 | 4.99E+10 | 4.48E+08 | 4.52E+10 | 4.38E+08 | 4.30E+10 |
| KD215 | 4.46E+08 | 4.50E+10 | 3.55E+08 | 3.59E+10 | 3.48E+08 | 3.43E+10 |
| KD222 | 3.94E+08 | 3.97E+10 | 3.63E+08 | 3.66E+10 | 3.55E+08 | 3.50E+10 |
| KD223 | 4.69E+08 | 4.74E+10 | 4.26E+08 | 4.30E+10 | 4.16E+08 | 4.09E+10 |
| **GS** | DKD301 | 4.59E+08 | 4.59E+10 | 4.05E+08 | 4.05E+10 | 3.81E+08 | 3.69E+10 |
| DKD302 | 4.77E+08 | 4.77E+10 | 4.24E+08 | 4.24E+10 | 3.99E+08 | 3.89E+10 |
| DKD303 | 4.71E+08 | 4.71E+10 | 4.15E+08 | 4.15E+10 | 3.90E+08 | 3.80E+10 |
| DKD304 | 4.76E+08 | 4.76E+10 | 4.03E+08 | 4.03E+10 | 3.88E+08 | 3.77E+10 |
| DKD305 | 4.52E+08 | 4.52E+10 | 3.86E+08 | 3.86E+10 | 3.74E+08 | 3.63E+10 |
| DKD306 | 4.59E+08 | 4.59E+10 | 4.04E+08 | 4.04E+10 | 3.95E+08 | 3.84E+10 |
| DKD307 | 4.75E+08 | 4.75E+10 | 4.20E+08 | 4.20E+10 | 4.10E+08 | 3.98E+10 |
| DKD308 | 4.79E+08 | 4.79E+10 | 3.95E+08 | 3.95E+10 | 3.78E+08 | 3.55E+10 |
| DKD309 | 4.80E+08 | 4.80E+10 | 4.23E+08 | 4.23E+10 | 4.13E+08 | 4.01E+10 |
| DKD310 | 4.86E+08 | 4.86E+10 | 4.22E+08 | 4.22E+10 | 3.88E+08 | 3.74E+10 |

Supplemental Table 2. Reads mapping statistics and coverage of depth.

| **Breed** | **Sample** | **Non-redundant reads** | **Mapped reads** | **Properly paired reads** | **Properly mapped bases** | **Mean deptha** |
| --- | --- | --- | --- | --- | --- | --- |
| **TM** | DQZA01 | 3.86E+08 | 3.85E+08 | 3.82E+08 | 3.85E+10 | 16.22 |
| DQZA06 | 3.90E+08 | 3.89E+08 | 3.85E+08 | 3.58E+10 | 14.75 |
| DQZA12 | 3.99E+08 | 3.98E+08 | 3.94E+08 | 3.66E+10 | 15 |
| DQZA18 | 3.38E+08 | 3.37E+08 | 3.34E+08 | 3.33E+10 | 13.75 |
| DQZA19 | 3.62E+08 | 3.61E+08 | 3.58E+08 | 3.57E+10 | 15.13 |
| DQZA23 | 3.77E+08 | 3.76E+08 | 3.72E+08 | 3.71E+10 | 15.72 |
| DQZA33 | 4.03E+08 | 4.02E+08 | 3.98E+08 | 3.98E+10 | 16.35 |
| DQZA55 | 3.58E+08 | 3.57E+08 | 3.54E+08 | 3.53E+10 | 14.54 |
| DQZA80 | 4.05E+08 | 4.04E+08 | 4.01E+08 | 4.00E+10 | 16.36 |
| DQZA81 | 4.05E+08 | 4.04E+08 | 4.00E+08 | 4.00E+10 | 16.38 |
| **DQ** | DQ25 | 4.02E+08 | 4.01E+08 | 3.97E+08 | 3.97E+10 | 16.29 |
| DQ28 | 4.17E+08 | 4.16E+08 | 4.12E+08 | 4.12E+10 | 16.91 |
| DQ29 | 3.67E+08 | 3.66E+08 | 3.63E+08 | 3.62E+10 | 14.83 |
| DQ32 | 3.83E+08 | 3.83E+08 | 3.79E+08 | 3.79E+10 | 15.44 |
| DQ33 | 4.00E+08 | 3.99E+08 | 3.94E+08 | 3.95E+10 | 16.22 |
| DQ45 | 3.36E+08 | 3.35E+08 | 3.31E+08 | 3.32E+10 | 13.62 |
| DQ52 | 4.12E+08 | 4.12E+08 | 4.08E+08 | 4.07E+10 | 17.05 |
| DQ54 | 3.22E+08 | 3.21E+08 | 3.18E+08 | 3.18E+10 | 13.36 |
| DQ59 | 3.59E+08 | 3.59E+08 | 3.55E+08 | 3.58E+10 | 14.68 |
| DQ60 | 3.97E+08 | 3.96E+08 | 3.92E+08 | 3.92E+10 | 16.47 |
| **LJ** | YL1 | 3.88E+08 | 3.88E+08 | 3.84E+08 | 3.84E+10 | 16.11 |
| YL5 | 3.88E+08 | 3.87E+08 | 3.85E+08 | 3.84E+10 | 16.15 |
| YL7 | 3.72E+08 | 3.71E+08 | 3.69E+08 | 3.68E+10 | 15.51 |
| LJ1 | 4.05E+08 | 4.04E+08 | 4.01E+08 | 4.01E+10 | 16.82 |
| LJ12 | 4.04E+08 | 4.04E+08 | 4.01E+08 | 4.00E+10 | 16.73 |
| LJ13 | 3.86E+08 | 3.85E+08 | 3.83E+08 | 3.82E+10 | 15.66 |
| LJ2 | 3.47E+08 | 3.46E+08 | 3.43E+08 | 3.43E+10 | 14.03 |
| LJ6 | 3.70E+08 | 3.69E+08 | 3.67E+08 | 3.66E+10 | 14.99 |
| LJ8 | 3.82E+08 | 3.82E+08 | 3.78E+08 | 3.78E+10 | 15.39 |
| WM3 | 3.28E+08 | 3.27E+08 | 3.24E+08 | 3.24E+10 | 13.33 |
| **YJ** | YJ01 | 4.07E+08 | 4.07E+08 | 4.03E+08 | 4.03E+10 | 17.06 |
| YJ03 | 3.65E+08 | 3.64E+08 | 3.61E+08 | 3.60E+10 | 15.26 |
| YJ08 | 3.57E+08 | 3.56E+08 | 3.53E+08 | 3.52E+10 | 14.47 |
| YJ10 | 3.63E+08 | 3.62E+08 | 3.59E+08 | 3.58E+10 | 15.1 |
| YJ14 | 3.50E+08 | 3.49E+08 | 3.46E+08 | 3.45E+10 | 14.27 |
| YJ15 | 3.80E+08 | 3.71E+08 | 3.68E+08 | 3.67E+10 | 15.11 |
| YJ16 | 3.69E+08 | 3.68E+08 | 3.65E+08 | 3.63E+10 | 15.27 |
| YJ17 | 3.77E+08 | 3.76E+08 | 3.73E+08 | 3.72E+10 | 15.67 |
| YJ21 | 3.77E+08 | 3.77E+08 | 3.74E+08 | 3.72E+10 | 15.25 |
| YJ26 | 3.94E+08 | 3.93E+08 | 3.89E+08 | 3.89E+10 | 16 |
| **KM** | KD106 | 2.90E+08 | 2.89E+08 | 2.86E+08 | 2.87E+10 | 11.79 |
| KD107 | 4.16E+08 | 4.15E+08 | 4.12E+08 | 4.15E+10 | 17.02 |
| KD110 | 3.99E+08 | 3.98E+08 | 3.95E+08 | 3.94E+10 | 16.15 |
| KD113 | 4.09E+08 | 4.09E+08 | 4.06E+08 | 4.05E+10 | 16.66 |
| KD117 | 4.05E+08 | 4.04E+08 | 4.01E+08 | 4.01E+10 | 16.47 |
| KD207 | 3.90E+08 | 3.89E+08 | 3.85E+08 | 3.89E+10 | 16.35 |
| KD208 | 4.36E+08 | 4.35E+08 | 4.30E+08 | 4.35E+10 | 18.29 |
| KD215 | 3.47E+08 | 3.46E+08 | 3.42E+08 | 3.46E+10 | 14.53 |
| KD222 | 3.54E+08 | 3.53E+08 | 3.49E+08 | 3.53E+10 | 14.75 |
| KD223 | 4.13E+08 | 4.12E+08 | 4.08E+08 | 4.12E+10 | 17.25 |
| **GS** | DKD301 | 3.79E+08 | 3.78E+08 | 3.74E+08 | 3.75E+10 | 15.35 |
| DKD302 | 3.98E+08 | 3.97E+08 | 3.93E+08 | 3.93E+10 | 16.5 |
| DKD303 | 3.89E+08 | 3.88E+08 | 3.85E+08 | 3.85E+10 | 15.78 |
| DKD304 | 3.87E+08 | 3.86E+08 | 3.82E+08 | 3.83E+10 | 15.63 |
| DKD305 | 3.69E+08 | 3.68E+08 | 3.65E+08 | 3.65E+10 | 14.94 |
| DKD306 | 3.94E+08 | 3.93E+08 | 3.90E+08 | 3.90E+10 | 16.23 |
| DKD307 | 4.09E+08 | 4.08E+08 | 4.04E+08 | 4.04E+10 | 16.87 |
| DKD308 | 3.77E+08 | 3.76E+08 | 3.72E+08 | 3.67E+10 | 15.35 |
| DKD309 | 4.11E+08 | 4.10E+08 | 4.06E+08 | 4.05E+10 | 16.94 |
| DKD310 | 3.87E+08 | 3.86E+08 | 3.83E+08 | 3.83E+10 | 16.02 |

a Only reads mapped to autosomes were used to calculated the coverage of depth.

Supplemental Table 3. Number of SNPs and indels before and after filtering.

| **Breed** | **Raw or filtered** | **Total SNPs** | **Homozygous SNPs** | **Heterozygous SNPs** | **Transition (Ts)** | **Tranversion (Tv)** | **Ts/Tv ratio** | **Total indels** |
| --- | --- | --- | --- | --- | --- | --- | --- | --- |
| **TM** | Raw | 10549266 | 467012 | 10082254 | 7102815 | 3446451 | 2.06 | 3550586 |
| **TM** | Filtered | 9920205 | 366926 | 9553279 | 6806472 | 3113733 | 2.19 | 2367482 |
| **DQ** | Raw | 10502132 | 476161 | 10025971 | 7066396 | 3435736 | 2.06 | 3573889 |
| **DQ** | Filtered | 9879829 | 373887 | 9505942 | 6770978 | 3108851 | 2.18 | 2371143 |
| **LJ** | Raw | 10974106 | 385258 | 10588848 | 7370647 | 3603459 | 2.05 | 3543228 |
| **LJ** | Filtered | 10222950 | 275624 | 9947326 | 6987755 | 3235195 | 2.16 | 2397289 |
| **YJ** | Raw | 11026994 | 451754 | 10575240 | 7409061 | 3617933 | 2.05 | 3761445 |
| **YJ** | Filtered | 10391381 | 350609 | 10040772 | 7108584 | 3282797 | 2.17 | 2418303 |
| **KM** | Raw | 8604617 | 466554 | 8138063 | 5750784 | 2853833 | 2.02 | 3086943 |
| **KM** | Filtered | 8080911 | 368558 | 7712353 | 5505930 | 2574981 | 2.14 | 2040832 |
| **GS** | Raw | 6160658 | 1081986 | 5078672 | 4096989 | 2063669 | 1.99 | 2607072 |
| **GS** | Filtered | 5736155 | 953546 | 4782609 | 3892089 | 1844066 | 2.11 | 1649891 |

Supplemental Table 4. Number of annotated SNPs in different gene regions.

| **Breed** | **Intergenica** | **ncRNAb** | **UTRc** | **Intronic** | **Splicing** | **Exonicd** | | |
| --- | --- | --- | --- | --- | --- | --- | --- | --- |
| Synonymous | Non-synonymous | Stop alteringe |
| **TM** | 6740952 | 5852 | 64673 | 3036167 | 341 | 41564 | 30655 | 456 |
| **DQ** | 6721418 | 5796 | 64517 | 3015432 | 330 | 41389 | 30895 | 469 |
| **LJ** | 6979631 | 5860 | 60848 | 3111349 | 334 | 37291 | 27542 | 508 |
| **YJ** | 7076149 | 6113 | 68316 | 3163600 | 353 | 43693 | 33178 | 550 |
| **KM** | 5511354 | 4636 | 52982 | 2453223 | 317 | 33103 | 25059 | 441 |
| **GS** | 3906036 | 3358 | 37801 | 1746639 | 224 | 23495 | 18467 | 323 |

a Including "intergenic", "upstream" and "downstream" given by ANNOVAR.

b Including "ncRNA_exonic", "ncRNA_intronic", "ncRNA_splicing" and "ncRNA_UTR".

c Including "UTR5” and "UTR3".

d Including "exonic" and "exonic;splicing".

e Including "stopgain SNV" and "stoploss SNV".

Supplemental Table 5. Number of annotated indels in different gene regions.

| **Breed** | **Intergenica** | **ncRNAb** | **UTRc** | **Intronic** | **Splicing** | **Exonicd** | | |
| --- | --- | --- | --- | --- | --- | --- | --- | --- |
| Frameshifte | Nonframeshiftf | Stop alteringg |
| **TM** | 1784684 | 913 | 17714 | 897763 | 280 | 2141 | 1297 | 39 |
| **DQ** | 1798645 | 923 | 18032 | 904839 | 303 | 2220 | 1319 | 37 |
| **LJ** | 1798884 | 878 | 16853 | 902190 | 230 | 1672 | 881 | 47 |
| **YJ** | 1825578 | 980 | 18338 | 913637 | 282 | 2291 | 1426 | 43 |
| **KM** | 1549243 | 770 | 15318 | 772097 | 283 | 1983 | 1119 | 43 |
| **GS** | 1321106 | 677 | 13069 | 661442 | 250 | 1735 | 889 | 30 |

a Including "intergenic", "upstream" and "downstream" given by ANNOVAR.

b Including "ncRNA_exonic", "ncRNA_intronic", "ncRNA_splicing" and "ncRNA_UTR".

c Including "UTR5” and "UTR3".

d Including "exonic" and "exonic;splicing".

e Including "frameshift deletion", "frameshift insertion" and "frameshift substitution".

f Including "nonframeshift deletion", "nonframeshift insertion" and "nonframeshift substitution".

g Including "stopgain SNV" and "stoploss SNV".

Supplemental Table 6. Genomic regions highly differentiated (*Z*(*FST*)>5) between high-, middle- and low-altitude breeds.

| **Chromosome** | **Window start** | **Window end** | **Marker number** | **Overall** | | **High vs low** | | **High vs middle** | | **Middle vs low** | | | **Genes included** |
| --- | --- | --- | --- | --- | --- | --- | --- | --- | --- | --- | --- | --- | --- |
| *FST* | *Z*(*FST*) | *FST* | *Z*(*FST*) | *FST* | *Z*(*FST*) | *FST* | *Z*(*FST*) | |
| 10 | 48600000 | 48700000 | 1078 | 0.624 | 10.830 | 0.749 | 10.968 | 0.494 | 8.024 | 0.21 | | 1.844 | EPAS1 |
| 10 | 8000000 | 8100000 | 638 | 0.571 | 9.750 | 0.678 | 9.767 | 0.16 | 1.861 | 0.511 | | 6.749 | MSRB3 |
| 10 | 8100000 | 8200000 | 624 | 0.531 | 8.935 | 0.653 | 9.345 | 0.177 | 2.175 | 0.452 | | 5.788 |  |
| 21 | 28100000 | 28200000 | 1370 | 0.51 | 8.507 | 0.623 | 8.838 | 0.247 | 3.466 | 0.351 | | 4.142 | ENSCAFG00000006135,ENSCAFG00000030672,OR51V1,ENSCAFG00000031701,ENSCAFG00000024181,ENSCAFG00000029518,ENSCAFG00000029568,ENSCAFG00000030286 |
| 21 | 28200000 | 28300000 | 942 | 0.508 | 8.466 | 0.633 | 9.007 | 0.235 | 3.245 | 0.323 | | 3.685 | OR51B4,ENSCAFG00000029662,OR51B5,OR51B6,ENSCAFG00000006184,ENSCAFG00000030286 |
| 10 | 48500000 | 48600000 | 875 | 0.474 | 7.773 | 0.596 | 8.381 | 0.339 | 5.164 | 0.197 | | 1.632 | EPAS1 |
| 10 | 100000 | 200000 | 257 | 0.466 | 7.610 | 0.557 | 7.722 | 0.266 | 3.817 | 0.405 | | 5.022 | ENSCAFG00000031189,ITGA7,ENSCAFG00000000061,RDH5,CD63,GDF11,SARNP |
| 10 | 8200000 | 8300000 | 520 | 0.464 | 7.569 | 0.582 | 8.145 | 0.262 | 3.743 | 0.275 | | 2.903 |  |
| 21 | 28000000 | 28100000 | 1024 | 0.464 | 7.569 | 0.553 | 7.654 | 0.184 | 2.304 | 0.364 | | 4.354 | ENSCAFG00000029441,OR52A1,ENSCAFG00000032056,ENSCAFG00000032322 |
| 31 | 28200000 | 28300000 | 9 | 0.463 | 7.549 | 0.395 | 4.983 | 0.67 | 11.271 | 0.349 | | 4.109 | ENSCAFG00000009309,ENSCAFG00000009315 |
| 17 | 19000000 | 19100000 | 222 | 0.446 | 7.203 | 0.554 | 7.671 | 0.197 | 2.544 | 0.267 | | 2.773 | NCOA1 |
| 10 | 300000 | 400000 | 237 | 0.445 | 7.182 | 0.51 | 6.927 | 0.308 | 4.592 | 0.402 | | 4.973 | PMEL17,CDK2,ENSCAFG00000029813,RAB5B,SUOX,IKZF4,ENSCAFG00000031955 |
| 11 | 23600000 | 23700000 | 577 | 0.434 | 6.958 | 0.548 | 7.570 | 0.064 | 0.090 | 0.368 | | 4.419 | CXCL14 |
| 5 | 56700000 | 56800000 | 268 | 0.421 | 6.693 | 0.424 | 5.474 | 0.254 | 3.595 | 0.453 | | 5.804 | ENSCAFG00000019232,SLC35E2B,NADK,GNB1 |
| 5 | 56400000 | 56500000 | 272 | 0.413 | 6.530 | 0.397 | 5.017 | 0.326 | 4.924 | 0.441 | | 5.608 | ENSCAFG00000027074,ACAP3,PUSL1,CPSF3L,GLTPD1,TNFRSF4,SDF4,B3GALT6,FAM132A,UBE2J2,SCNN1D |
| 10 | 500000 | 600000 | 217 | 0.395 | 6.163 | 0.442 | 5.778 | 0.274 | 3.964 | 0.364 | | 4.354 | ENSCAFG00000027982,RNF41,NABP2,SLC39A5,ANKRD52,COQ10A,CS,SMARCC2 |
| 13 | 37800000 | 37900000 | 311 | 0.395 | 6.163 | 0.278 | 3.006 | 0.541 | 8.891 | 0.472 | | 6.114 | CYHR1,KIFC2,FOXH1,SHARPIN,VPS28,ADCK5,CPSF1,SLC39A4,TONSL |
| 5 | 56500000 | 56600000 | 404 | 0.386 | 5.980 | 0.416 | 5.338 | 0.072 | 0.237 | 0.393 | | 4.826 | GLTPD1,TAS1R3,DVL1,MXRA8,AURKAIP1,CCNL2,MRPL20,ANKRD65,TMEM88B,VWA1,ATAD3A |
| 24 | 3100000 | 3200000 | 231 | 0.375 | 5.756 | 0.495 | 6.674 | 0.234 | 3.226 | 0.106 | | 0.149 |  |
| 31 | 29300000 | 29400000 | 2 | 0.375 | 5.756 | 0.351 | 4.240 | 0.11 | 0.938 | 0.506 | | 6.668 | SNORA70,ENSCAFG00000032220,ENSCAFG00000009541 |
| 10 | 1400000 | 1500000 | 185 | 0.373 | 5.715 | 0.391 | 4.916 | 0.269 | 3.872 | 0.396 | | 4.875 | SHMT2,R3HDM2 |
| 10 | 400000 | 500000 | 272 | 0.372 | 5.694 | 0.449 | 5.896 | 0.185 | 2.322 | 0.289 | | 3.131 | ZC3H10,ERBB3,PA2G4,ESYT1,MYL6B,SMARCC2 |
| 24 | 3000000 | 3100000 | 294 | 0.371 | 5.674 | 0.472 | 6.285 | 0.269 | 3.872 | 0.153 | | 0.915 | INSM1,C20orf26,ENSCAFG00000005278 |
| 22 | 48900000 | 49000000 | 417 | 0.369 | 5.633 | 0.492 | 6.623 | 0.114 | 1.012 | 0.233 | | 2.219 |  |
| 14 | 8300000 | 8400000 | 220 | 0.366 | 5.572 | 0.399 | 5.051 | 0.423 | 6.714 | 0.193 | | 1.567 | LRRC4 |
| 14 | 8400000 | 8500000 | 191 | 0.366 | 5.572 | 0.412 | 5.271 | 0.459 | 7.378 | 0.105 | | 0.132 |  |
| 28 | 10200000 | 10300000 | 324 | 0.366 | 5.572 | 0.4 | 5.068 | 0.198 | 2.562 | 0.352 | | 4.158 | U6 |
| 17 | 18900000 | 19000000 | 221 | 0.363 | 5.511 | 0.466 | 6.184 | 0.127 | 1.252 | 0.222 | | 2.039 |  |
| 3 | 5400000 | 5500000 | 448 | 0.36 | 5.450 | 0.486 | 6.522 | 0.079 | 0.366 | 0.264 | | 2.724 |  |
| 14 | 8500000 | 8600000 | 204 | 0.359 | 5.429 | 0.407 | 5.186 | 0.469 | 7.563 | 0.089 | | -0.128 |  |
| 7 | 800000 | 900000 | 427 | 0.357 | 5.389 | 0.182 | 1.383 | 0.533 | 8.743 | 0.481 | | 6.260 | LGR6,ENSCAFG00000010570,PTPN7,GPR37L1 |
| 10 | 8500000 | 8600000 | 462 | 0.355 | 5.348 | 0.448 | 5.879 | 0.081 | 0.403 | 0.322 | | 3.669 |  |
| 5 | 41900000 | 42000000 | 419 | 0.352 | 5.287 | 0.37 | 4.561 | 0.194 | 2.488 | 0.333 | | 3.848 | ENSCAFG00000026606,PEMT,ENSCAFG00000018534,RASD1,MED9 |
| 6 | 28400000 | 28500000 | 555 | 0.352 | 5.287 | 0.394 | 4.966 | 0.212 | 2.820 | 0.31 | | 3.473 | SNORD45,PDXDC1,NTAN1,RRN3 |
| 10 | 7900000 | 8000000 | 477 | 0.351 | 5.266 | 0.472 | 6.285 | 0.123 | 1.178 | 0.22 | | 2.007 | U6 |
| 9 | 700000 | 800000 | 337 | 0.348 | 5.205 | 0.266 | 2.803 | 0.34 | 5.182 | 0.468 | | 6.048 | ENSCAFG00000005732 |
| 15 | 33900000 | 34000000 | 433 | 0.348 | 5.205 | 0.447 | 5.862 | 0.289 | 4.241 | 0.104 | | 0.116 |  |
| 6 | 39900000 | 40000000 | 348 | 0.346 | 5.164 | 0.163 | 1.061 | 0.433 | 6.898 | 0.544 | | 7.287 | NHLRC4,RHOT2,C16orf13,WDR90,FAM195A,WFIKKN1,PIGQ,C16orf11,CAPN15 |
| 5 | 34800000 | 34900000 | 626 | 0.345 | 5.144 | 0.464 | 6.150 | 0.047 | -0.224 | 0.306 | | 3.408 | ENSCAFG00000027855,MYH1 |
| 5 | 56600000 | 56700000 | 403 | 0.343 | 5.103 | 0.366 | 4.493 | 0.067 | 0.145 | 0.387 | | 4.728 | C1orf233,ATAD3A,TMEM240,SSU72,MIB2,MMP23B,ENSCAFG00000019232 |
| 5 | 33000000 | 33100000 | 407 | 0.341 | 5.063 | 0.325 | 3.800 | 0.358 | 5.514 | 0.352 | | 4.158 | C17orf59,AURKB,CTC1,PFAS,RANGRF,SLC25A35,ARHGEF15 |
| 5 | 34600000 | 34700000 | 636 | 0.341 | 5.063 | 0.457 | 6.031 | 0.195 | 2.507 | 0.133 | | 0.589 | MYH13,MYH8 |
| 5 | 41400000 | 41500000 | 288 | 0.341 | 5.063 | 0.353 | 4.273 | 0.282 | 4.112 | 0.364 | | 4.354 | MYO15A,DRG2,GID4,ATPAF2 |
| 17 | 21700000 | 21800000 | 353 | 0.341 | 5.063 | 0.398 | 5.034 | 0.141 | 1.510 | 0.3 | | 3.310 | ENSCAFG00000005180,RBKS |
| 5 | 34700000 | 34800000 | 361 | 0.338 | 5.001 | 0.454 | 5.981 | 0.131 | 1.326 | 0.211 | | 1.860 | MYH8,MYH4,MYH1 |
| 5 | 35300000 | 35400000 | 619 | 0.336 | 4.961 | 0.33 | 3.885 | 0.191 | 2.433 | 0.412 | | 5.136 |  |
| 5 | 34900000 | 35000000 | 620 | 0.334 | 4.920 | 0.417 | 5.355 | 0.206 | 2.710 | 0.224 | | 2.072 | MYH3,SCO1,ADPRM,TMEM220 |
| 10 | 200000 | 300000 | 218 | 0.334 | 4.920 | 0.397 | 5.017 | 0.198 | 2.562 | 0.306 | | 3.408 | ENSCAFG00000000069,ENSCAFG00000000071,TMEM198,MMP19,WIBG,DGKA,PMEL17 |
| 13 | 37700000 | 37800000 | 302 | 0.333 | 4.900 | 0.275 | 2.955 | 0.389 | 6.086 | 0.389 | | 4.761 | ENSCAFG00000001554,ENSCAFG00000001559,HSF1,DGAT1,TMEM249,ENSCAFG00000001588,FBXL6 |
| 3 | 6100000 | 6200000 | 655 | 0.332 | 4.879 | 0.446 | 5.846 | 0.068 | 0.163 | 0.242 | | 2.365 |  |
| 6 | 38900000 | 39000000 | 330 | 0.331 | 4.859 | 0.154 | 0.909 | 0.531 | 8.707 | 0.434 | | 5.494 | ACA64,SNORA64,SNORA64,ENSCAFG00000032381,NTHL1,SLC9A3R2,ENSCAFG00000029888,ZNF598,ENSCAFG00000031645,GFER,NOXO1,TBL3,RNF151,ENSCAFG00000019472,NDUFB10 |
| 9 | 600000 | 700000 | 381 | 0.331 | 4.859 | 0.275 | 2.955 | 0.289 | 4.241 | 0.432 | | 5.462 | ENSCAFG00000032216,FSCN2,ACTG1,ENSCAFG00000005732,NPLOC4,C17orf70 |
| 10 | 0 | 100000 | 327 | 0.331 | 4.859 | 0.425 | 5.491 | 0.026 | -0.612 | 0.376 | | 4.549 | ENSCAFG00000028808,ENSCAFG00000000049,ENSCAFG00000000051,ENSCAFG00000000054,METTL7B,ITGA7 |
| 14 | 8200000 | 8300000 | 414 | 0.331 | 4.859 | 0.205 | 1.771 | 0.398 | 6.252 | 0.463 | | 5.967 | SND1 |
| 15 | 5900000 | 6000000 | 250 | 0.331 | 4.859 | 0.202 | 1.721 | 0.477 | 7.710 | 0.421 | | 5.282 | STK40,EVA1B,SH3D21,THRAP3 |
| 37 | 800000 | 900000 | 352 | 0.325 | 4.736 | 0.093 | -0.122 | 0.466 | 7.507 | 0.495 | | 6.488 | C2orf88,HIBCH |
| 6 | 39800000 | 39900000 | 304 | 0.32 | 4.635 | 0.088 | -0.206 | 0.462 | 7.433 | 0.517 | | 6.847 | ENSCAFG00000022867,MSLN,CHTF18,GNG13,RPUSD1,MSLNL,NARFL,HAGHL,CCDC78,METRN,FBXL16,WDR24,JMJD8,STUB1,RHBDL1,RHOT2 |
| 5 | 32200000 | 32300000 | 252 | 0.319 | 4.614 | 0.265 | 2.786 | 0.416 | 6.585 | 0.347 | | 4.076 | DVL2,PHF23,GABARAP,CTDNEP1,ELP5,CLDN7,SLC2A4,ENSCAFG00000016128,EIF5A,GPS2,ENSCAFG00000016148,ACAP1 |
| 9 | 300000 | 400000 | 266 | 0.313 | 4.492 | 0.319 | 3.699 | 0.331 | 5.016 | 0.277 | | 2.936 | MYADML2,TSPAN10,NOTUM,PYCR1,MAFG,SIRT7,PCYT2,NPB,ANAPC11,ALYREF,LRRC45,STRA13,ASPSCR1 |
| 13 | 37900000 | 38000000 | 321 | 0.308 | 4.390 | 0.283 | 3.090 | 0.387 | 6.049 | 0.295 | | 3.229 | PPP1R16A,GPT,MFSD3,RECQL4,LRRC24,LRRC14,C8orf82,ARHGAP39 |
| 22 | 3100000 | 3200000 | 395 | 0.308 | 4.390 | 0.401 | 5.085 | 0.278 | 4.038 | 0.091 | | -0.096 | LPAR6 |
| 14 | 8600000 | 8700000 | 258 | 0.307 | 4.370 | 0.347 | 4.172 | 0.413 | 6.529 | 0.109 | | 0.198 | SND1 |
| 7 | 300000 | 400000 | 262 | 0.306 | 4.349 | 0.135 | 0.588 | 0.461 | 7.415 | 0.416 | | 5.201 | ENSCAFG00000010412,ENSCAFG00000030988,KDM5B |
| 21 | 20400000 | 20500000 | 449 | 0.305 | 4.329 | 0.405 | 5.152 | 0.102 | 0.791 | 0.177 | | 1.306 |  |
| 5 | 32900000 | 33000000 | 445 | 0.302 | 4.268 | 0.257 | 2.650 | 0.363 | 5.607 | 0.339 | | 3.946 | U8,ALOX12B,ALOXE3,HES7,PER1,ENSCAFG00000017001,TMEM107 |
| 9 | 1700000 | 1800000 | 336 | 0.302 | 4.268 | 0.226 | 2.126 | 0.256 | 3.632 | 0.478 | | 6.211 | TBC1D16 |
| 13 | 38000000 | 38100000 | 413 | 0.302 | 4.268 | 0.266 | 2.803 | 0.381 | 5.939 | 0.313 | | 3.522 | COMMD5,ZNF7,ZNF517 |
| 1 | 1100000 | 1200000 | 299 | 0.301 | 4.247 | 0.234 | 2.262 | 0.395 | 6.197 | 0.351 | | 4.142 | NFATC1,ATP9B |
| 20 | 57300000 | 57400000 | 666 | 0.301 | 4.247 | 0.128 | 0.470 | 0.456 | 7.323 | 0.45 | | 5.755 | ENSCAFG00000027299,APC2,ADAMTSL5,MBD3,MEX3D,PLK5,REEP6,PCSK4 |
| 11 | 23500000 | 23600000 | 498 | 0.3 | 4.227 | 0.404 | 5.136 | 0.145 | 1.584 | 0.151 | | 0.882 | NEUROG1 |
| 5 | 32300000 | 32400000 | 291 | 0.296 | 4.145 | 0.211 | 1.873 | 0.455 | 7.304 | 0.331 | | 3.816 | ZBTB4,ACAP1,TNK1,PLSCR3,ACADVL,ENSCAFG00000023205,NLGN2,C17orf74,TMEM102,FGF11,CHRNB1 |
| 6 | 38700000 | 38800000 | 267 | 0.296 | 4.145 | 0.15 | 0.842 | 0.419 | 6.640 | 0.424 | | 5.331 | cfa-mir-1842,ENSCAFG00000026498,ENSCAFG00000019379,RNPS1,DNASE1L2,ECI1,E4F1,PGP,BRICD5,MLST8,CASKIN1,TRAF7 |
| 25 | 50900000 | 51000000 | 668 | 0.296 | 4.145 | 0.204 | 1.755 | 0.448 | 7.175 | 0.349 | | 4.109 | KIF1A,ENSCAFG00000029684,ENSCAFG00000012788 |
| 6 | 38300000 | 38400000 | 448 | 0.294 | 4.105 | 0.189 | 1.501 | 0.369 | 5.717 | 0.406 | | 5.038 | ENSCAFG00000030445,SRRM2,TCEB2,PRSS33,PRSS27,ZG16B,PRSS22 |
| 5 | 46700000 | 46800000 | 720 | 0.293 | 4.084 | 0.405 | 5.152 | 0.109 | 0.920 | 0.139 | | 0.687 | 5S_rRNA,ITGB3BP,ALG6 |
| 7 | 400000 | 500000 | 338 | 0.289 | 4.003 | 0.156 | 0.943 | 0.446 | 7.138 | 0.391 | | 4.794 | KDM5B |
| 25 | 50700000 | 50800000 | 609 | 0.287 | 3.962 | 0.151 | 0.859 | 0.44 | 7.027 | 0.404 | | 5.005 | ENSCAFG00000012744,ENSCAFG00000030158 |
| 23 | 4100000 | 4200000 | 705 | 0.282 | 3.860 | 0.299 | 3.361 | 0.021 | -0.704 | 0.408 | | 5.071 | PDCD6IP |
| 21 | 27100000 | 27200000 | 892 | 0.281 | 3.840 | 0.316 | 3.648 | 0.372 | 5.773 | 0.098 | | 0.018 | OR51F1,ENSCAFG00000032229,ENSCAFG00000028889,ENSCAFG00000029863,ENSCAFG00000031838 |
| 25 | 50800000 | 50900000 | 418 | 0.28 | 3.819 | 0.203 | 1.738 | 0.431 | 6.861 | 0.314 | | 3.539 | GPR35,ENSCAFG00000032707,KIF1A |
| 5 | 56200000 | 56300000 | 443 | 0.274 | 3.697 | 0.262 | 2.735 | 0.11 | 0.938 | 0.409 | | 5.087 | HES4,PLEKHN1,C1orf170,ISG15,AGRN,ENSCAFG00000028544,RNF223,C1orf159 |
| 5 | 63700000 | 63800000 | 559 | 0.273 | 3.677 | 0.275 | 2.955 | 0.108 | 0.902 | 0.435 | | 5.511 | TCF25,SPIRE2,FANCA,ENSCAFG00000028840 |
| 11 | 3600000 | 3700000 | 373 | 0.273 | 3.677 | 0.308 | 3.513 | 0.411 | 6.492 | 0.044 | | -0.862 | YTHDC2 |
| 13 | 36600000 | 36700000 | 707 | 0.272 | 3.656 | 0.166 | 1.112 | 0.424 | 6.732 | 0.34 | | 3.962 | BAI1 |
| 7 | 1000000 | 1100000 | 359 | 0.271 | 3.636 | 0.099 | -0.020 | 0.473 | 7.636 | 0.371 | | 4.468 | TIMM17A,ENSCAFG00000010633,IPO9 |
| 10 | 40300000 | 40400000 | 790 | 0.271 | 3.636 | 0.092 | -0.139 | 0.302 | 4.481 | 0.468 | | 6.048 | MFSD9,SLC9A2 |
| 13 | 38400000 | 38500000 | 740 | 0.266 | 3.534 | 0.21 | 1.856 | 0.397 | 6.234 | 0.271 | | 2.838 | IREB2,WFS1 |
| 18 | 26100000 | 26200000 | 495 | 0.266 | 3.534 | 0.188 | 1.484 | 0.357 | 5.496 | 0.332 | | 3.832 | cfa-mir-129-2 |
| 7 | 900000 | 1000000 | 433 | 0.259 | 3.391 | 0.118 | 0.301 | 0.481 | 7.784 | 0.333 | | 3.848 | ENSCAFG00000029225,ELF3,RNPEP |
| 5 | 35500000 | 35600000 | 540 | 0.258 | 3.371 | 0.16 | 1.011 | 0.368 | 5.699 | 0.319 | | 3.620 |  |
| 5 | 31600000 | 31700000 | 363 | 0.254 | 3.289 | 0.139 | 0.656 | 0.393 | 6.160 | 0.327 | | 3.751 | PFN1,RNF167,SLC25A11,ENSCAFG00000023813,KIF1C,INCA1,CAMTA2,SPAG7,ENO3 |
| 6 | 39400000 | 39500000 | 514 | 0.254 | 3.289 | 0.11 | 0.165 | 0.386 | 6.031 | 0.38 | | 4.614 | UNKL,GNPTG,TSR3,BAIAP3,UBE2I,ENSCAFG00000019593 |
| 9 | 18100000 | 18200000 | 94 | 0.253 | 3.269 | 0.155 | 0.926 | 0.422 | 6.695 | 0.292 | | 3.180 | ENSCAFG00000028735,ENSCAFG00000013770 |
| 13 | 37500000 | 37600000 | 367 | 0.252 | 3.249 | 0.126 | 0.436 | 0.369 | 5.717 | 0.367 | | 4.402 | ENSCAFG00000030148,ENSCAFG00000029569,SHARPIN,CYC1,PLEC,GRINA,SPATC1,ENSCAFG00000032288,OPLAH,EXOSC4,GPAA1 |
| 15 | 2000000 | 2100000 | 231 | 0.252 | 3.249 | 0.097 | -0.054 | 0.384 | 5.994 | 0.38 | | 4.614 | 7SK,SCMH1,SLFNL1,CTPS1 |
| 24 | 46300000 | 46400000 | 1239 | 0.248 | 3.167 | 0.069 | -0.528 | 0.374 | 5.810 | 0.414 | | 5.168 | OSBPL2,ADRM1,LAMA5,CABLES2,ENSCAFG00000012676,RBBP8NL |
| 26 | 27100000 | 27200000 | 1104 | 0.247 | 3.147 | 0.077 | -0.392 | 0.383 | 5.976 | 0.389 | | 4.761 | PRAME,ENSCAFG00000013622 |
| 14 | 8000000 | 8100000 | 261 | 0.246 | 3.126 | 0.175 | 1.264 | 0.369 | 5.717 | 0.286 | | 3.082 | IMPDH1,PRRT4,RBM28 |
| 20 | 56900000 | 57000000 | 956 | 0.246 | 3.126 | 0.087 | -0.223 | 0.351 | 5.385 | 0.411 | | 5.119 | AP3D1,IZUMO4,MOB3A,MKNK2,BTBD2 |
| 7 | 700000 | 800000 | 371 | 0.244 | 3.086 | 0.1 | -0.004 | 0.476 | 7.692 | 0.322 | | 3.669 | PPP1R12B,UBE2T,LGR6 |
| 11 | 3500000 | 3600000 | 312 | 0.242 | 3.045 | 0.27 | 2.870 | 0.346 | 5.293 | 0.043 | | -0.878 | B4GALT7,ENSCAFG00000000228,TMED9,YTHDC2 |
| 13 | 37200000 | 37300000 | 340 | 0.241 | 3.025 | 0.135 | 0.588 | 0.361 | 5.570 | 0.334 | | 3.865 | TIGD5,ZNF623,PYCRL,TSTA3,ZC3H3,GSDMD,NAPRT1,EEF1D |
| 14 | 2200000 | 2300000 | 712 | 0.239 | 2.984 | 0.263 | 2.752 | 0.35 | 5.367 | 0.056 | | -0.666 | ENSCAFG00000001251 |
| 37 | 400000 | 500000 | 388 | 0.236 | 2.923 | 0.049 | -0.866 | 0.389 | 6.086 | 0.385 | | 4.696 | ASNSD1,ANKAR,OSGEPL1 |
| 10 | 16800000 | 16900000 | 304 | 0.235 | 2.902 | 0.121 | 0.351 | 0.332 | 5.035 | 0.35 | | 4.125 | ENSCAFG00000031984,MIOX,ADM2,ENSCAFG00000000612,ENSCAFG00000030366,PPP6R2,NCAPH2,LMF2 |
| 14 | 5800000 | 5900000 | 423 | 0.233 | 2.861 | 0.287 | 3.158 | 0.474 | 7.655 | 0.033 | | -1.041 |  |
| 14 | 6400000 | 6500000 | 211 | 0.228 | 2.760 | 0.057 | -0.730 | 0.364 | 5.625 | 0.37 | | 4.451 | cfa-mir-335,COPG2,ENSCAFG00000031473,MEST |
| 20 | 55900000 | 56000000 | 770 | 0.228 | 2.760 | 0.154 | 0.909 | 0.393 | 6.160 | 0.248 | | 2.463 | DOHH,C19orf77,NFIC |
| 16 | 34500000 | 34600000 | 679 | 0.226 | 2.719 | 0.1 | -0.004 | 0.205 | 2.691 | 0.417 | | 5.217 |  |
| 14 | 400000 | 500000 | 198 | 0.223 | 2.658 | 0.124 | 0.402 | 0.338 | 5.145 | 0.294 | | 3.213 | ENSCAFG00000024874 |
| 14 | 8100000 | 8200000 | 292 | 0.222 | 2.637 | 0.094 | -0.105 | 0.332 | 5.035 | 0.33 | | 3.799 | cfa-mir-129-1,LEP |
| 18 | 25600000 | 25700000 | 721 | 0.221 | 2.617 | 0.119 | 0.318 | 0.394 | 6.179 | 0.282 | | 3.017 | cfa-mir-210,ENSCAFG00000028503,RASSF7,PHRF1,PTDSS2,RNH1,K-RAS,LRRC56,C11orf35 |
| 24 | 47000000 | 47100000 | 1620 | 0.221 | 2.617 | 0.103 | 0.047 | 0.343 | 5.238 | 0.337 | | 3.913 | COL20A1,CHRNA4,KCNQ2 |
| 6 | 38800000 | 38900000 | 298 | 0.22 | 2.597 | 0.074 | -0.443 | 0.333 | 5.053 | 0.363 | | 4.337 | ENSCAFG00000026712,SNORD60,RAB26,PKD1,TSC2,NTHL1 |
| 25 | 51000000 | 51100000 | 1312 | 0.219 | 2.576 | 0.123 | 0.385 | 0.361 | 5.570 | 0.287 | | 3.099 | ENSCAFG00000031521,SNED1 |
| 28 | 40800000 | 40900000 | 943 | 0.213 | 2.454 | 0.101 | 0.013 | 0.336 | 5.108 | 0.318 | | 3.604 | 5S_rRNA,cfa-mir-202,VENTX,ADAM8,TUBGCP2 |
| 5 | 700000 | 800000 | 658 | 0.211 | 2.413 | 0.165 | 1.095 | 0.334 | 5.072 | 0.209 | | 1.827 | B3GAT1,GLB1L2 |
| 24 | 23300000 | 23400000 | 495 | 0.207 | 2.332 | 0.181 | 1.366 | 0.362 | 5.588 | 0.175 | | 1.273 | ASIP |
| 14 | 7800000 | 7900000 | 341 | 0.195 | 2.087 | 0.082 | -0.308 | 0.405 | 6.382 | 0.219 | | 1.990 | FLNC,CCDC136,OPN1SW,CALU |
| 18 | 200000 | 300000 | 782 | 0.194 | 2.067 | 0.122 | 0.368 | 0.383 | 5.976 | 0.174 | | 1.257 |  |
| 24 | 46400000 | 46500000 | 1769 | 0.194 | 2.067 | 0.074 | -0.443 | 0.367 | 5.680 | 0.285 | | 3.066 | cfa-mir-133c,cfa-mir-1-1,GATA5 |
| 10 | 19100000 | 19200000 | 1011 | 0.192 | 2.026 | 0.039 | -1.035 | 0.347 | 5.311 | 0.311 | | 3.490 | TBC1D22A |
| 14 | 3000000 | 3100000 | 748 | 0.186 | 1.904 | 0.194 | 1.585 | 0.361 | 5.570 | 0.041 | | -0.911 | AKR1B1 |
| 6 | 11100000 | 11200000 | 394 | 0.185 | 1.883 | 0.179 | 1.332 | 0.346 | 5.293 | 0.06 | | -0.601 | BHLHA15,RPL23A,TECPR1,LMTK2 |
| 18 | 100000 | 200000 | 315 | 0.181 | 1.802 | 0.109 | 0.149 | 0.389 | 6.086 | 0.146 | | 0.801 | ENSCAFG00000032173,ABCA13 |
| 6 | 39300000 | 39400000 | 456 | 0.176 | 1.700 | 0.049 | -0.866 | 0.331 | 5.016 | 0.269 | | 2.805 | ENSCAFG00000031348,ENSCAFG00000019542,TELO2,ENSCAFG00000029361,CLCN7,CCDC154,C16orf91,UNKL |
| 14 | 3100000 | 3200000 | 456 | 0.173 | 1.639 | 0.142 | 0.706 | 0.349 | 5.348 | 0.114 | | 0.279 | SLC35B4,LRGUK |
| 14 | 15600000 | 15700000 | 603 | 0.173 | 1.639 | 0.121 | 0.351 | 0.375 | 5.828 | 0.132 | | 0.573 | U6 |
| 24 | 23500000 | 23600000 | 586 | 0.173 | 1.639 | 0.107 | 0.115 | 0.357 | 5.496 | 0.154 | | 0.931 |  |
| 29 | 16300000 | 16400000 | 590 | 0.173 | 1.639 | 0.151 | 0.859 | 0.377 | 5.865 | 0.098 | | 0.018 | SGK3 |
| 14 | 3500000 | 3600000 | 351 | 0.162 | 1.414 | 0.098 | -0.037 | 0.359 | 5.533 | 0.13 | | 0.540 |  |
| 14 | 3600000 | 3700000 | 365 | 0.154 | 1.251 | 0.104 | 0.064 | 0.344 | 5.256 | 0.101 | | 0.067 |  |

Supplemental Table 7. Dating the selective sweeps at regions containing oxygen-responsive genes

| **Sweep region** | **Candidate gene** | ***Z*(*FST*)** | | | **Sweep date** |
| --- | --- | --- | --- | --- | --- |
| Middle vs low | High vs middle | High vs low |
| **Chr10: 48600000-48700000** | *EPAS1* | 1.844 | 8.024 | 10.968 | Middle to high |
| **Chr10: 8000000-8100000** | *MSRB3* | 6.749 | 1.861 | 9.767 | Low to middle |
| **Chr21: 28100000-28200000** | *HBB* | 4.142 | 3.466 | 8.838 | Low to high |
| **Chr10:300000-400000** | *CDK2* | 4.973 | 4.592 | 6.927 | Low to high |
| **Chr5: 56700000-56800000** | *GNB1* | 5.804 | 3.595 | 5.474 | Low to middle |

Supplemental Table 8. Four non-synonymous mutations in *EPAS1*.

| **Genomic location** | **Reference allele** | **Mutant allele** | **Amino acid variant (ENSCAFP00000003819)** | **Amino acid variant (XP_531807.2)** | **SIFT score and consequence** |
| --- | --- | --- | --- | --- | --- |
| **chr10:48626862 (+)** | G | A | G305S | G411S | 0.04 (deleterious) |
| **chr10:48630137 (+)** | T | G | D494E | D600E | 0.30 (tolerated) |
| **chr10:48630153 (+)** | G | A | V500M | V606M | 0.13 (tolerated) |
| **chr10:48633379 (+)** | C | T | P750S | P856S | 0.49 (tolerated) |

Supplemental Table 9. Hematologic and hemorheologic parameters of adult indigenous dogs and Tibetan Mastiffs from continuous altitudes.

| **Parameter** | **Indigenous dog 500 m (*n* = 27)** | **Indigenous dog 1500 m (*n* = 84)** | **Indigenous dog 2500 m (*n* = 144)** | **Indigenous dog 3000 m (*n* = 69)** | **Tibetan Mastiff 3000 m (*n* = 62)** |
| --- | --- | --- | --- | --- | --- |
| **Red blood cell (RBC) (106/ul)** | 6.66  (0.92) | 7.73  (0.98) | 8.14  (0.84) | 7.52  (0.94) | 8.01  (0.81) |
| **Hemoglobin (HGB) (g/L)** | 127.78  (19.59) | 155.29  (21.58) | 170.05  (19.21) | 165.07  (23.62) | 174.89  (18.44) |
| **Hematocrit (HCT) (%)** | 43.74  (6.13) | 50.81  (6.75) | 54.34  (5.91) | 50.23  (6.74) | 54.56  (5.34) |
| **Mean corpuscular volume (MCV) (fl)** | 65.83  (4.2) | 65.86  (4.66) | 66.88  (3.52) | 66.96  (4.42) | 68.29  (3.78) |
| **Mean corpsular hemoglobin (MCH) (pg)** | 19.13  (1.29) | 20.06  (1.68) | 20.86  (1.27) | 21.91  (1.66) | 21.85  (1.39) |
| **Mean corpuscular hemoglobin concentration (MCHC) (g/L)** | 291.26  (7.46) | 305.14  (15.35) | 312.44  (8.07) | 327.86  (11.57) | 315.51  (38.41) |
| **Red blood cell distribution width (RDW) (%)** | 15.19  (1.47) | 14.88  (1.45) | 14.17  (1.12) | 13.5  (1.34) | 12.94  (1.26) |
| **Plasma viscosity (mPa·s)** | 1.6  (0.29) | 1.77  (0.48) | 1.81  (0.31) | 2.26  (0.49) | 2.41  (0.89) |
| **Relative index of low shear** | 12.78  (3.43) | 13.16  (5.52) | 12.71  (2.82) | 11.33  (3.34) | 11.79  (4.57) |
| **Relative index of high shear** | 2.27  (0.63) | 2.36  (0.92) | 2.29  (0.57) | 2.02  (0.62) | 2.13  (0.73) |
| **Erythrocyte aggregation index (AI)** | 5.65  (0.53) | 5.59  (0.55) | 5.6  (0.51) | 5.64  (0.46) | 5.5  (0.59) |
| **Viscometric aggregation index (VAI)** | 3.88  (0.37) | 3.84  (0.38) | 3.84  (0.35) | 3.87  (0.31) | 3.77  (0.4) |
| **Casson viscosity (mPa·s)** | 2.89  (0.85) | 3.13  (0.77) | 3.26  (0.75) | 3.54  (0.85) | 3.85  (0.87) |
| **RBC internal viscosity (mPa·s)** | 0.64  (0.12) | 0.71  (0.19) | 0.72  (0.12) | 0.91  (0.2) | 0.96  (0.36) |
| **Low shear flow resistance (109 SI)** | 60.08  (15.04) | 64.13  (12.34) | 66.9  (11.65) | 73.59  (15.38) | 77.76  (18.47) |
| **Middle shear flow resistance (109 SI)** | 34.08  (9.3) | 36.73  (8.08) | 38.28  (7.8) | 41.72  (9.33) | 44.91  (9.9) |
| **High shear flow resistance (109 SI)** | 25.12  (7.13) | 27.16  (6.33) | 28.3  (6.17) | 30.74  (7.13) | 33.29  (7.42) |
| **Fibrinogen (g/L)** | 3.52  (0.65) | 3.89  (1.06) | 3.97  (0.68) | 4.98  (1.09) | 5.3  (1.97) |
| **Yield stress (mPa)** | 7.78  (1.93) | 8.23  (1.57) | 8.59  (1.48) | 9.54  (2.03) | 9.91  (2.87) |
| **Relative index of middle shear** | 3.08  (0.84) | 3.19  (1.26) | 3.1  (0.74) | 2.74  (0.82) | 2.88  (1) |

* Values are represented as mean (standard deviation) in adult dogs.

Supplemental Table 10. Association test between *EPAS1* genotypes and blood-related traits in DQ.

| **Parameter** | **DQ genotype a** | | |
| --- | --- | --- | --- |
| AA  (*n* = 40) | GA  (*n* = 29) | ANOVA  *P*-value |
| **Red blood cell (RBC) (106/ul)** | 7.4  (0.78) | 7.56  (1.17) | 0.5 |
| **Hemoglobin (HGB) (g/L)** | 160.46  (22.11) | 165.52  (26.81) | 0.4 |
| **Hematocrit (HCT) (%)** | 49.26  (6.27) | 50.14  (7.72) | 0.61 |
| **Mean corpuscular volume (MCV) (fl)** | 66.67  (4.65) | 66.58  (4.48) | 0.93 |
| **Mean corpsular hemoglobin (MCH) (pg)** | 21.62  (1.79) | 21.89  (1.66) | 0.54 |
| **Mean corpuscular hemoglobin concentration (MCHC) (g/L)** | 324.84  (10.23) | 329.21  (10.74) | 0.09 |
| **Red blood cell distribution width (RDW) (%)** | 13.29  (1.43) | 13.83  (1.42) | 0.12 |
| **Plasma viscosity (mPa·s)** | 2.29  (0.38) | 2.26  (0.48) | 0.75 |
| **Relative index of low shear** | 10.62  (3.61) | 12.05  (3.56) | 0.12 |
| **Relative index of high shear** | 1.9 (0.63) | 2.15 (0.67) | 0.12 |
| **Erythrocyte aggregation index (AI)** | 5.6  (0.38) | 5.64  (0.46) | 0.72 |
| **Viscometric aggregation index (VAI)** | 3.84  (0.26) | 3.87  (0.32) | 0.72 |
| **Casson viscosity (mPa·s)** | 3.37  (0.75) | 3.77  (0.96) | 0.06 |
| **RBC internal viscosity (mPa·s)** | 0.92  (0.15) | 0.9  (0.19) | 0.75 |
| **Low shear flow resistance (109 SI)** | 69.62  (13.84) | 78.14  (16.22) | 0.03 |
| **Middle shear flow resistance (109 SI)** | 39.64  (8.34) | 44.43  (10.32) | 0.04 |
| **High shear flow resistance (109 SI)** | 29.25  (6.35) | 32.77  (7.99) | 0.05 |
| **Fibrinogen (g/L)** | 5.04  (0.83) | 4.97  (1.05) | 0.75 |
| **Yield stress (mPa)** | 8.98  (1.82) | 10.1  (2.04) | 0.04 |
| **Relative index of middle shear** | 2.58  (0.86) | 2.92  (0.89) | 0.12 |

* Values are represented as mean (standard deviation) in adult dogs.

a G: reference allele; A: mutant allele.
